# Supplementary material for: Diol pretreatment to fractionate a reactive lignin in lignocellulosic biomass biorefineries
Source: Royal Society of Chemistry journal article supplement (doi:10.1039/c9gc00596j), 2019-01-01
Supplement: c9gc00596j1.pdf [file c9gc00596j1.pdf]

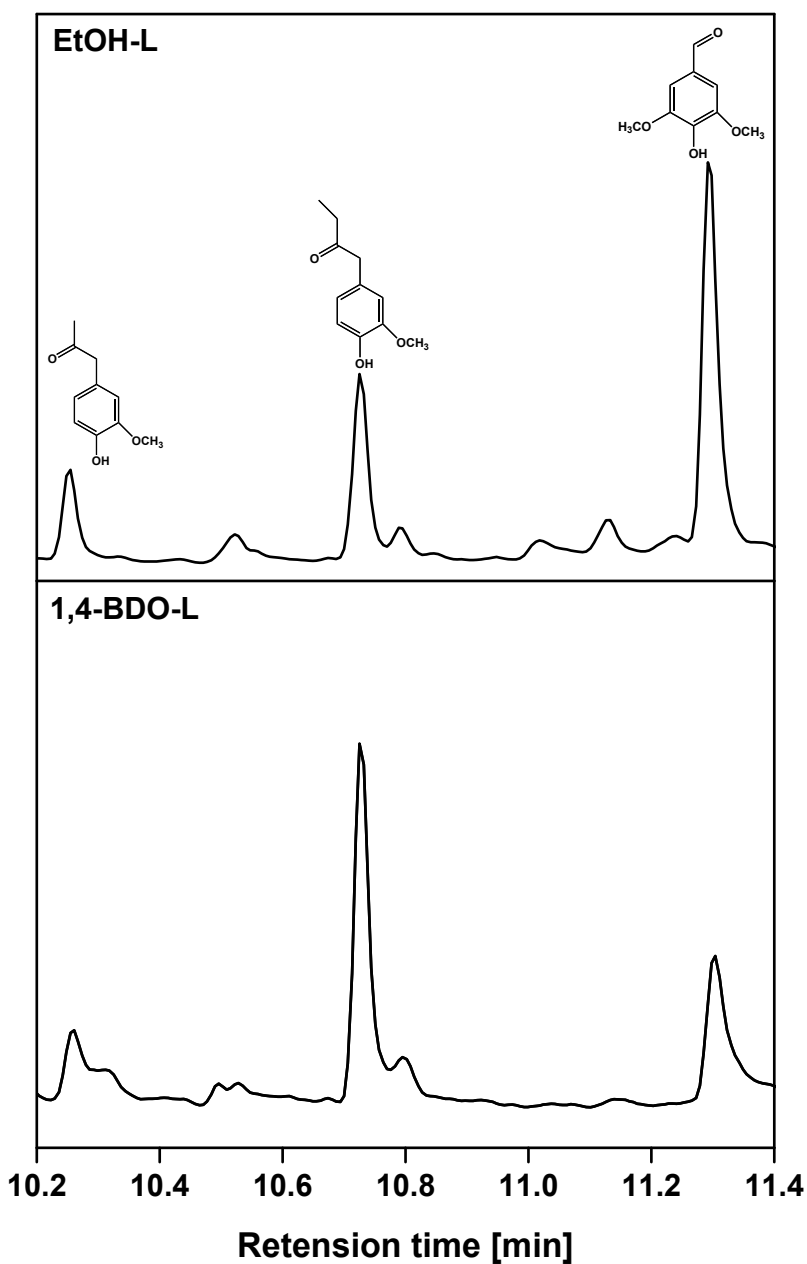

**Fig. S1** Gas chromatogram of EtOH (15 mM acid and 65% EtOH) and 1,4-BDO (15 mM acid and 65% 1,4-BDO) dissolved lignin.

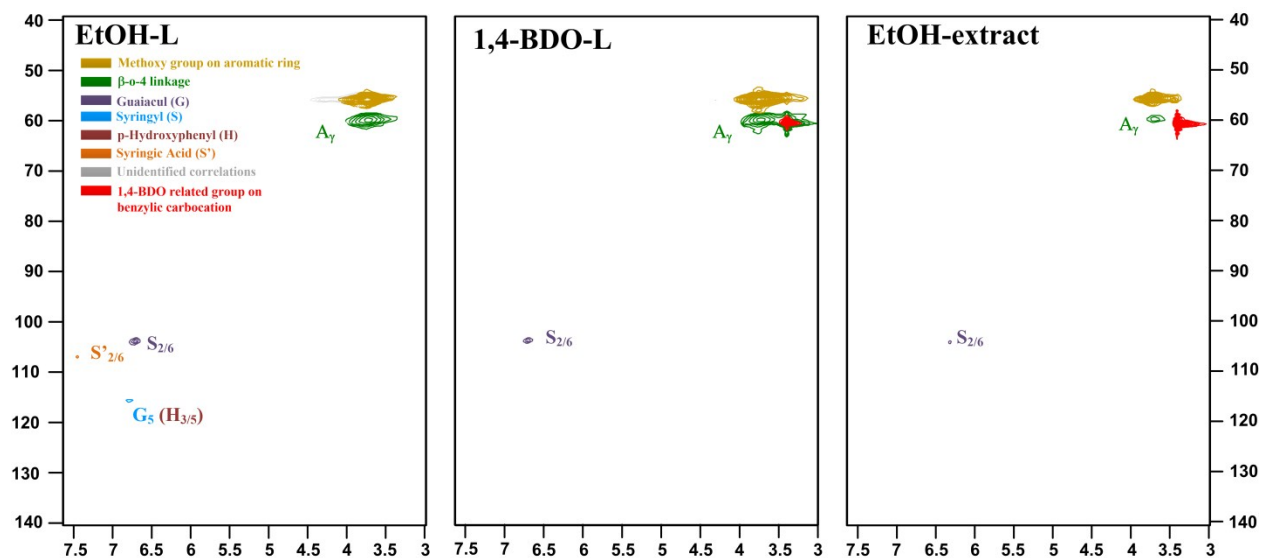

**Fig. S2** 2D HSQC NMR spectra from pretreated lignin. Abbreviation was depicted in Fig. 2.

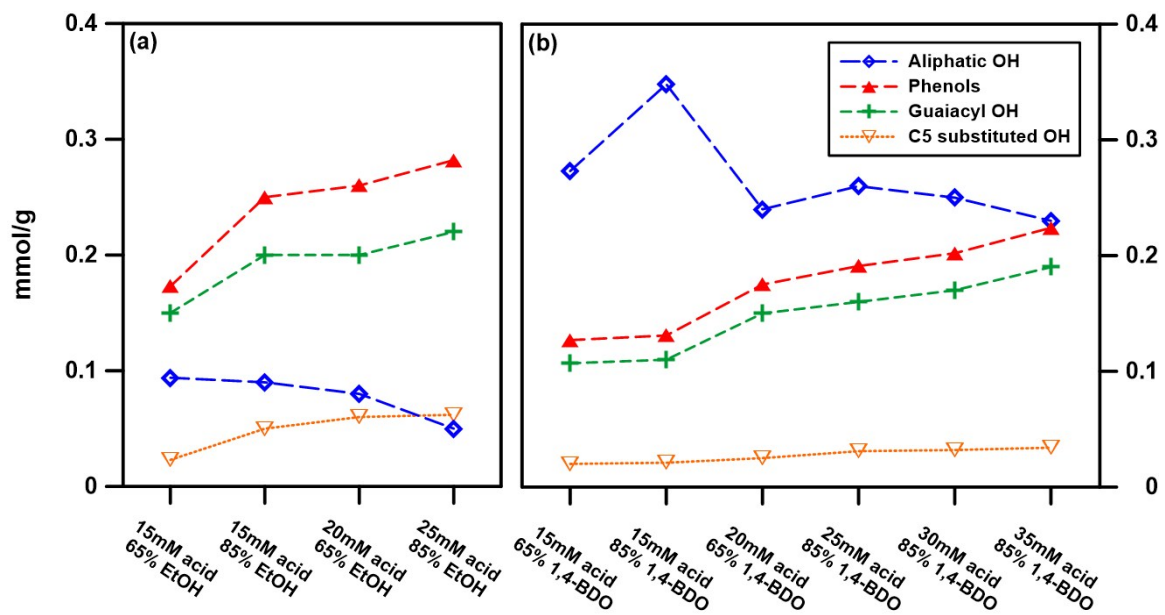

**Fig. S3** Hydroxyl groups of soluble lignin at different pretreatment severities using EtOH and 1,4-BDO
